# Supplementary material for: Materials demand for electricity in climate mitigation scenarios
Source: Research Square preprint supplement (doi:10.21203/rs.3.rs-1229622/v1), 2022-02-23
Supplement: Supplementary file 3 [file 6f869ad05c157fc021ba2e78.xlsx]

## Sheet: Onshoreoffshore wind
Material	Onshore_DD_PMG	Onshore_AG	Offshore_DD_PMG	Offshore_AG
Ag	0	0	0	0
Al	13200 (Garrett + Ronde 2011);	4900 (Razdan + Garrett 2015a); 5080 (Razdan + Garrett 2015b);	1000, 898, 898, 556 (Chipindula et al 2018); 2140 (Elsam Engineering 2004);	1000, 898, 898, 556 (Chipindula et al 2018); 2140 (Elsam Engineering 2004);
Cd	0	0	0	0
Co	0	0	0
Concrete	375440 (Garrett + Ronde 2011); 402000 (Wilburn 2011);	401340 (Razdan + Garrett 2015a); 456720 (Razdan + Garrett 2015b); 402000 (Wilburn 2011);	1375 (Elsam Engineering 2004);	1375 (Elsam Engineering 2004);
Cu	3320 (Garrett + Ronde 2011); 3000 (Wilburn 2011); 4700 (Habib + Wenzel 2016); 5761, 2994, 6759, 2540, 3538 (BBF Associates 2011);	1700 (Razdan + Garrett 2015a); 1740 (Razdan + Garrett 2015b); 1850 (Garcia-Olivares et al 2012); 4982 (Habib + Wenzel 2016);	10000 (Garcia-Olivares et al 2012); 9580 (Falconer, 2009); 1650, 5218, 5218, 9601 (Chipindula et al 2018); 2337 (Elsam Engineering 2004);	10000 (Garcia-Olivares et al 2012); 9580 (Falconer, 2009); 1650, 5218, 5218, 9601 (Chipindula et al 2018); 2337 (Elsam Engineering 2004);
Dy	12 (DOE 2011); 28 (Hoenderdaal et al 2013);	0	12 (DOE 2011), 28 (Hoenderdaal et al 2013);	0
Ga	0	0	0	0
In	0	0	0	0
Li	0	0	0	0
Mn	0	0	0	0
Nd	186 (DOE 2011), 216 (Wilburn 2011); 198 (Hoenderdaal et al 2013);	0	186 (DOE 2011), 216 (Wilburn 2011); 198 (Hoenderdaal et al 2013);	0
Ni	377 (Fizaine + Court 2015)	377 (Fizaine + Court 2015)	377 (Fizaine + Court 2015)	377 (Fizaine + Court 2015)
Pt	0	0	0	0
Se	0	0	0	0
Steel	122780 (Garrett + Ronde 2011); 123000 (Wilburn 2011);	120480 (Razdan + Garrett 2015a); 130480 (Razdan + Garrett 2015b); 123000 (Wilburn 2011);	147576, 803094, 917224, 530417 (Chipindula et al 2018); 193257 (Elsam Engineering 2004);	147576, 803094, 917224, 530417 (Chipindula et al 2018); 193257 (Elsam Engineering 2004);
Te	0	0	0	0
Cement	38717, 60070 (Garrett + Ronde 2011); 41456, 64320 (Wilburn 2011);	41388, 64214 (Razdan + Garrett 2015a); 47099, 73075 (Razdan + Garrett 2015b); 41456, 64320 (Wilburn 2011);	142, 220 (Elsam Engineering 2004)	142, 220 (Elsam Engineering 2004)
Fiberglass	9580 (Garrett + Ronde 2011); 6800 (Wilburn 2011);	8980 (Razdan + Garrett 2015a); 7400 (Razdan + Garrett 2015b); 6800 (Wilburn 2011);	5823, 5833, 5833, 10551 (Chipindula et al 2018); 10921 (Elsam Engineering 2004);	5823, 5833, 5833, 10551 (Chipindula et al 2018); 10921 (Elsam Engineering 2004);

## Sheet: Onshoreoffshore wind refs and c
Assuming that for onshore wind turbines, material use of non-RE materials is the same for DD vs AG types unless explicitly stated in source. Likewise for offshore turbines.
Assuming that onshore and offshore PM turbines have similar intensitites of rare earth usage
GREEN = final values
RED = rejected values
2015 Razdan + Garrett (a)		found cited in NREL 2015 Table 30: https://www.nrel.gov/docs/fy17osti/66861.pdf
Life Cycle Assessment of Electricity Production from an onshore V100-2.0 MW Wind Plant
https://www.vestas.com/~/media/vestas/about/sustainability/pdfs/lcav10020mw181215.pdf
Numbers taken from Table 6, summed across turbines, foundations, cables, switchgears, and transformer
Metric tons for a 50MW power plant of V100-2.0 MW onshore turbines, no permanent magnets
	tons	tons/GW	Notes
Concrete	20067	401340	Concrete C12, C30, C45, amounts unspecified. LCA used C12/15 and C30/37, also employing the latter for C45	Conversion of tons concrete to tons cement	Concrete volume (m^3)
Steel/cast steel/sintered steel, sum of Unalloyed, low alloyed and Highly alloyed, plus cast iron	6024	120480		Assuming 1600 kg/m^3	250838
Copper	83	1660		Assuming 2500 kg/m^3	160536
Copper alloys	2	40
Sum of Copper and Copper alloys	85	1700			Cement (kg)	Cement (tons)
Aluminum and Aluminum alloys	245	4900		1600 kg/m^3 density and 165 kg/m^3 cement content	4.13882e+07	41388.2
Fiberglass (ceramic/glass)	449	8980		2500 kg/m^3 density and 400 kg/m^3 cement content	64214400	64214.4
2015 Razdan + Garrett (b)		found cited in NREL 2015 Table 30: https://www.nrel.gov/docs/fy17osti/66861.pdf
Life Cycle Assessment of Electricity Production from an onshore V110-2.0 MW Wind Plant
https://www.vestas.com/~/media/vestas/about/sustainability/pdfs/lcav11020mw181215.pdf
Numbers taken from Table 6, summed across turbines, foundations, cables, switchgears, and transformer
Metric tons for a 50MW power plant of V110-2.0 MW onshore turbines, no permanent magnets
	tons	tons/GW	Notes	Conversion of tons concrete to tons cement	Concrete volume (m^3)
Concrete	22836	456720	Concrete C12, C30, C45, amounts unspecified. LCA used C12/15 and C30/37, also employing the latter for C45	Assuming 1600 kg/m^3	285450
Steel/cast steel/sintered steel, sum of Unalloyed, low alloyed and Highly alloyed	6524	130480		Assuming 2500 kg/m^3	182688
Copper	85	1700
Copper alloys	2	40			Cement (kg)	Cement (tons)
Sum of Copper and Copper alloys	87	1740		1600 kg/m^3 density and 165 kg/m^3 cement content	47099250	47099.2
Aluminum and Aluminum alloys	254	5080		2500 kg/m^3 density and 400 kg/m^3 cement content	73075200	73075.2
Fiberglass (ceramic/glass)	370	7400
2011 Garrett + Ronde		found cited in NREL 2015 Table 30: https://www.nrel.gov/docs/fy17osti/66861.pdf
Life Cycle Assessment of Electricity Production from a V90-2.0MW Gridstreamer Wind Plant
https://www.vestas.com/~/media/vestas/about/sustainability/pdfs/lca_v902mw_version1.pdf
Numbers taken from Table 5, summed across turbines, foundations, cables, switchgears, and transformer
Metric tons for a 50MW power plant of V90-2.0MW onshore turbines, containing permanent magnets
	tons	tons/GW	Notes	Conversion of tons concrete to tons cement	Concrete volume (m^3)
Concrete	18772	375440	Concrete C12, C30, C45, amounts unspecified. LCA used C12/15 and C30/37, also employing the latter for C45	Assuming 1600 kg/m^3	234650
Steel, sum of Unalloyed, low alloyed and Highly alloyed	6139	122780		Assuming 2500 kg/m^3	150176
Copper	166	3320
Copper alloys	0	0			Cement (kg)	Cement (tons)
Sum of Copper and Copper alloys	166	3320		1600 kg/m^3 density and 165 kg/m^3 cement content	38717250	38717.2
Aluminum and Aluminum alloys	660	13200		2500 kg/m^3 density and 400 kg/m^3 cement content	60070400	60070.4
Fiberglass (ceramic/glass)	479	9580
2011 Department of Energy		2010 report found cited in Elshkaki and Graedel 2014, Table 1: https://www.sciencedirect.com/science/article/abs/pii/S0306261914010125
Critical Materials Strategy		using updated 2011 report instead
https://www.energy.gov/sites/prod/files/2019/06/f63/DOE_CMS2011_FINAL_Full_1.pdf
Numbers taken from page 154
kgs per MW generation (600kg total magnet weight per MW for a PM direct drive system) converted to tons per GW generation
	tons/GW	Notes
Nd	186	from Arnold Magnetics RFI submission to DOE, 2011 (original source not found), 31% Nd content number from Electron Energy Corporation RFI submission to DOE (not found)	This is highly consistent with weight of "magnets" in Garrett + Ronde 2011 above
Dy	12	this is the low-end estimate, high-end estimate would be 24 (2-4% Dy range)
Garcia-Olivares et al 2012
A global renewable mix with proven technologies and common materials
https://doi.org/10.1016/j.enpol.2011.11.018
Numbers for Copper from Section 3.4 and Appendix C, Al from Section 3.6 and Appendix C, using 3MW non-PM Vestas V90 as model
Metric tons/MW converted to metric tons/GW, accounting for both turbine, grid connection, transformer, etc...
	standard onshore, tons/GW	standard offshore, tons/GW	Notes
Copper	1850	10000	original approximate calculation, these are a little rough but match fairly well with Vestas numbers
Aluminum	370		seems far too low, excluding Al from this study
Wilburn, 2011
Wind Energy in the US and Materials Required for the Land-Based Wind Turbine Industry From 2010 Through 2030
https://pubs.usgs.gov/sir/2011/5036/sir2011-5036.pdf
Numbers from Table 5 on page 12, based on next-gen onshore wind projections					Conversion of tons concrete to tons cement	Concrete volume (m^3)
kg/MW converted to metric tons/GW					Assuming 1600 kg/m^3	251250
	tons/GW	Notes			Assuming 2500 kg/m^3	160800
Steel + cast iron	123000
Concrete	402000					Cement (kg)	Cement (tons)
Copper	3000	Not explicitly stated to include associated infrastructure, but checks out with Vestas LCAs			1600 kg/m^3 density and 165 kg/m^3 cement content	41456250	41456.2
Nd	216	Calculation based on Hatch (2009) and Lifton (2009), assuming a PM turbine			2500 kg/m^3 density and 400 kg/m^3 cement content	64320000	64320
Fiberglass	6800
Hoenderdaal, S., Espinoza, L.T., Marscheider-Weidemann, F. and Graus, W., 2013. Can a dysprosium shortage threaten green energy technologies?. Energy, 49, pp.344-355.
https://www.sciencedirect.com/science/article/abs/pii/S0360544212008055
Numbers from Table 3, average of figures from collected interviews with industry experts
kg/MW converted to metric tons/GW
	tons/GW	Notes
Nd	198	Arnolds Magnetics, Avalon Inc., TechMetalsResearch, IMCOA, University of St. Polten, Chinese Society of Rare Earths, Less Common Metals Ltd., Magnet Motor GmpH, Ames Laboratory and the US: Department of Energy.
Dy	28
Habib and Wenzel 2016		cited in Månberger and Stenqvist, Global metal flows in the renewable energy transition: Exploring the effects of substitutes, technological mix and development
Reviewing resource criticality assessment from a dynamic and technology specific perspective – using the case of direct-drive wind turbines.
https://www.sciencedirect.com/science/article/abs/pii/S0959652615009920
Numbers from Table 2, assembled with input from manufacturers
Nd and Dy demand based partly on Habib and Wenzel 2014 (https://www.sciencedirect.com/science/article/abs/pii/S0959652614003837)
kg/MW converted to metric tons/GW
tons/GW	DD PM	PM-free gearbox	Notes
Nd	200	0	cite Habib and Wenzel 2014, which cites (Bauer et al., 2011; Hatch, 2011; Kleijn and Van der Voet, 2010; Speirs et al., 2013a) for Nd and Dy numbers
Dy	13	0	Bauer et al 2011 is DOE, can't find Hatch report. The rest are all themselves literature figures
Cu	4700	4982	Numbers from Table 2, assembled with input from manufacturers
BBF Associates, “Market study: current and projected wind and solar renewable electric generating capacity and resulting copper demand”. 2011.
https://copperalliance.org/wp-content/uploads/2017/03/Projected-wind-solar-copper-demand-1.pdf
Numbers for solar from Table 2, wind on Table 1
Most sites were constructed prior to 2010
Numbers converted from lbs/MW to tons/GW
ONSHORE	Meadow Lake, IN Phase II plant (99 MW; 66x1.5MW turbines)	Designed 100 MW (50x2MW Vestas)	Rattlesnake Rd, OR 102.9 MW (49x2.1MW)	Meridian Way KS 105MW (35x3MW)	Lone Star TX 400MW (200x2MW)	Notes
Cu	5761	2994	6759	2540	3538
Date opened	Phase II: June 2010		2008	2008	2008
I. K. Falconer (Univ. of Exeter), Metals Required for the UK’s Low Carbon Energy System: The case of copper usage in wind farms, University of Exeter, 2009
OFFSHORE	offshore wind	Notes
Cu	9580	based upon data from 14 planned or operating wind farms
Fizaine + Court 2015, Appendix A
Renewable electricity producing technologies and metal depletion: A sensitivity analysis using the EROI
https://www.sciencedirect.com/science/article/abs/pii/S0921800914003681
Numbers converted from tons/MW to tons/GW, rounded to nearest ton/GW
	Onshore wind	Offshore wind	Notes	Ostensibly from Ashby, M.F., 2013. Materials and the Environment: Eco-informed Material Choice. Butterworth-Heinemann, Elsevier, 2nd edition (628 pp.) and from EDF private data, cannot conclusively confirm either
Cu	1012	1484	offshore figure seems really low... perhaps not whole-plant in scope
Dy	1	22	these seem to incorporate some hidden assumptions for onshore/offshore PM/PM-free
Nd	6	151	these seem to incorporate some hidden assumptions for onshore/offshore PM/PM-free
Ni	377	377
Chipindula et al 2018
Life Cycle Environmental Impact of Onshore and Offshore Wind Farms in Texas
https://tethys.pnnl.gov/publications/life-cycle-environmental-impact-onshore-offshore-wind-farms-texas											ASSUMPTION FOR PLANT-WIDE MATERIALS ESTIMATES
Table A1						Conversion to tons/GW					if including transmission infrastructure estimates from Elsam 2004 report
kilograms	2 MW offshore shallow-water turbine	2.3 MW offshore shallow-water turbine	2.3MW offshore deep-water turbine	5 MW offshore deep-water turbine	Notes	2MW offshore, tons/GW	2.3MW offshore, tons/GW	2.3MW offshore, tons/GW	5MW offshore, tons/GW		2MW offshore, tons/GW	2.3MW offshore, tons/GW	2.3MW offshore, tons/GW	5MW offshore, tons/GW
Fiberglass or carbon fiber	11650	13417	13417	52754		5825	5833.48	5833.48	10550.8	Fiberglass or carbon fiber	5825	5833	5833	10551
Cast iron in rotor	8500	0	0	0		4250	0	0	0
Cast iron in nacelle	26366	68663	68663	990401		13183	29853.5	29853.5	198080
Steel in rotor	5400	1077	1077	0	does not include associated infrastructure, so these are low estimates	2700	468.261	468.261	0
Steel in nacelle	24082	50539	50539	156091		12041	21973.5	21973.5	31218.2
Copper in nacelle	1583	10029	10029	43715		791.5	4360.43	4360.43	8743	Cu	1649.5	5218.43	5218.43	9601
Al in nacelle	1271	1228	1228	961		635.5	533.913	533.913	192.2	Al	999.5	897.913	897.913	556.2
Steel in tower	165000	1123095	1123095	347460		82500	488302	488302	69492
Steel in foundation	62551	600000	862500	1150000		31275.5	260870	375000	230000
Concrete in foundation	0	0	0	0		0	0	0	0
					Total steel + cast iron	145950	801467	915597	528790	Steel	147576	803094	917224	530417
2006
Life cycle assessment of offshore and onshore sited wind power plants based on Vestas V90-3.0 MW turbines
https://www.vestas.com/~/media/vestas/about/sustainability/pdfs/lca_v90_june_2006.ashx
Table 4, excluding onshore wind findings as these are well older than 2010 (2006)
Vestas V90 3MW turbines, non-PM design
kg/turbine	Offshore turbine	kg/farm for transmission		kg total for a 1000 MW farm	metric tons/GW	Notes
Mn	2520	13300		853300	853.3	Al, Cu both seem quite low, and steel and concrete values are not given anywhere - excluding this study
Al	1950	122000		772000	772
Cu	551	203000		386667	386.667
2004
Life Cycle Assessment of offshore and onshore sited wind farms.
translated from the Danish Elsam Engineering report 186768 of March 2004 written in Danish
https://www.vestas.com/~/media/vestas/about/sustainability/pdfs/lca_v80_2004_uk.ashx#:~:text=Vestas%20Wind%20Systems%20A%2FS%20financed%20its%20own%20participation%20in,farms%20through%20their%20life%20cycles.
Table 5.3, assuming Vestas V80 2MW offshore turbine, excluding onshore wind findings as these are well older than 2010 (2006)
kg/turbine	Offshore turbine	kg/farm for transmission	Notes	kg total for a 1000 MW farm	metric tons/GW		Conversion of tons concrete to tons cement	Concrete volume (m^3)
Steel+high-strength steel+cast iron	383259	1627186	I'm assuming that these are non-PM turbines	193256686	193257		Assuming 1600 kg/m^3	859.375
Cu	2958	858237		2337237	2337.24		Assuming 2500 kg/m^3	550
Al	3545	364450		2136950	2136.95
Concrete	0	1375000		1375000	1375			Cement (kg)	Cement (tons)
Glass fibre	21842			10921000	10921		1600 kg/m^3 density and 165 kg/m^3 cement content	141797	141.797
							2500 kg/m^3 density and 400 kg/m^3 cement content	220000	220

## Sheet: Solar
Material	CSI_PV	CIGS	CDTE	ASIGE	CSP
Ag	10 (Manberger + Stenqvist 2018)	0	0	0	trough: 13, tower: 16 (Pihl et al 2012);
Al	38500 (Bodeker et al 2010); 8500 (Jean et al 2015); 19000 (Mason et al 2006); 19000 (IRENA 2017);	31300 (Bodeker et al 2010); 6885 (Jean et al 2015); 15390 (Mason et al 2006); 15390 (IRENA 2017)	31300 (Bodeker et al 2010); 6885 (Jean et al 2015); 15390 (Mason et al 2006); 15390 (IRENA 2017)	31300 (Bodeker et al 2010); 6885 (Jean et al 2015); 15390 (Mason et al 2006); 15390 (IRENA 2017)	trough: 0, tower: 11000 (Pihl et al 2012);
Cd	0	0	17, 62, 138 (Kavlak et al 2015); 29 (Jean et al., 2015);	0	0
Co	0	0	0	0	0
Concrete	63000 (Jean et al 2015); 65700 (Mason et al 2006); 47000 (IRENA 2017);	63000 (Jean et al 2015); 65700 (Mason et al 2006); 47000 (IRENA 2017);	63000 (Jean et al 2015); 65700 (Mason et al 2006); 47000 (IRENA 2017);	63000 (Jean et al 2015); 65700 (Mason et al 2006); 47000 (IRENA 2017);	trough: 2607500, tower: 750960 (Pihl et al 2012);
Cu	7000 (BBF Associates 2011); 4900 (Jean et al 2015); 7530 (Mason et al 2006); 7000 (IRENA 2017);	7000 (BBF Associates 2011); 4900 (Jean et al 2015); 7530 (Mason et al 2006); 7000 (IRENA 2017);	7000 (BBF Associates 2011); 4900 (Jean et al 2015); 7530 (Mason et al 2006); 7000 (IRENA 2017);	7000 (BBF Associates 2011); 4900 (Jean et al 2015); 7530 (Mason et al 2006); 7000 (IRENA 2017);	trough: 3200, tower: 1400 (Pihl et al 2012);
Dy	0	0	0	0	0
Ga	0	2, 4, 9 (Kavlak et al 2015); 9 (Jean et al., 2015);	0	0	0
In	0	7, 13, 28 (Kavlak et al 2015); 15 (Jean et al., 2015);	0	0	0
Li	0	0	0	0	0
Mn	0	0	0	0	trough: 2000, tower: 5700 (Pihl et al 2012);
Nd	0	0	0	0	0
Ni	1 (Frischknecht et al 2015)	0	0	0	trough: 940, tower: 1800 (Pihl et al 2012);
Pt	0	0	0	0	0
Se	0	17, 41, 161 (Kavlak et al 2015); 20 (Jean et al., 2015);	0	0	0
Steel	73000 (Jean et al 2015); 55900 (Mason et al 2006); 56000 (IRENA 2017)	73000 (Jean et al 2015); 55900 (Mason et al 2006); 56000 (IRENA 2017)	73000 (Jean et al 2015); 55900 (Mason et al 2006); 56000 (IRENA 2017)	73000 (Jean et al 2015); 55900 (Mason et al 2006); 56000 (IRENA 2017)	trough: 240000, tower: 400000 (Pihl et al 2012);
Te	0	0	19, 70, 156 (Kavlak et al 2015); 31 (Jean et al., 2015);	0	0
Cement	6497, 10080 (DOE 2005); 6775, 10512 (Mason et al 2006); 4847, 7520 (IRENA 2017);	6497, 10080 (DOE 2005); 6775, 10512 (Mason et al 2006); 4847, 7520 (IRENA 2017);	6497, 10080 (DOE 2005); 6775, 10512 (Mason et al 2006); 4847, 7520 (IRENA 2017);	6497, 10080 (DOE 2005); 6775, 10512 (Mason et al 2006); 4847, 7520 (IRENA 2017);	250000, 72000 (Pihl et al 2012)
Si	638, 2882, 6629 (Kavlak et al., 2015); 1460, 2020 (Jean et al., 2015); 7000 (IRENA 2017); 2930, 3450 (Frischknecht et al., 2020)	0	0	58 (Jean et al., 2015)	0
Glass	50000 (Jean et al., 2015); 70000 (IRENA 2017); 66700 (Rigby et al., 2011); 53,400 (Fthenakis et al., 2011)	50000 (Jean et al., 2015); 70000 (IRENA 2017); 66700 (Rigby et al., 2011); 53,400 (Fthenakis et al., 2011)	50000 (Jean et al., 2015); 70000 (IRENA 2017); 66700 (Rigby et al., 2011); 53,400 (Fthenakis et al., 2011)	50000 (Jean et al., 2015); 70000 (IRENA 2017); 66700 (Rigby et al., 2011); 53,400 (Fthenakis et al., 2011)	130000, 110,000 (Pihl et al., 2012)
Am assuming that usage of copper, steel, and concrete/cement, and glass in thin-film is identical to that of conventional PV
Am assuming that Aluminum use in thin-film solar frames is 81% of that for conventional PV, based on Bodeker et al 2010

## Sheet: Solar refs and calcs
Assuming that for conventional and thin-film solar, bulk material use intensity (Al, Cu, steel, concrete) is the same across all types unless explicitly stated in source.
Will list parabolic and central tower CSP as separate estimates within a single CSP category
GREEN = final values
RED = rejected values
Kavlak et al 2015
Metal production requirements for rapid photovoltaics deployment
https://pubs.rsc.org/en/content/articlelanding/2015/ee/c5ee00585j#!divAbstract
Numbers taken from Table 2,
tons/GW	CIGS	CDTE	c-Si	Notes
Cd		17,62,138		direct calculations, low/middle/high estimates
Ga	2,4,9			Dominish et al 2019 opted to use high values for Ga and In, medium values for Se, Cd, Te as these matched other studies well
In	7,13,28
Se	17,41,161
Te		19,70,156
Si			638, 2882, 6629
The Warren Centre, 2016
The Copper Technology Roadmap 2030: Asia’s growing appetite for copper
https://thewarrencentre.org.au/wp-content/uploads/2016/08/wc3488-1-The-Copper-Technology-Roadmap-2030.pdf
numbers from page 65 for solar, page 67 for wind
tons/GW (converted from tons/MW)	Solar	Wind	Notes
Cu	5000	3000	Estimated from cumulative solar installation of 70 GW by 2011, consuming 350000 tons of Cu	Solar - source is citing Creara Energy Expert 2015, but this appears to be a mis-cite. Estimating Infrastructure Requirements for a Near 100% Renewable Electricity Scenario in 2050 https://www.slideshare.net/sustenergy/estimating-infrastructure-requirements-for-a-near-100-renewable-electricity-scenario-in-2050
			Wind - estimated from cumulative installation of Cu in wind of 714000 tons for cumulative wind deployment of 238 GW by 2011
			Wind sources: IMF 2013: In our hands, Earth's precious resources. https://www.imf.org/external/pubs/ft/fandd/2013/09/picture.htm (Minerals of the Future, Glenn Gottselig); Global Wind Energy Council, 2016. Global Wind Statistics 2015.
			Solar sources: International Renewable Energy Agency Solar Photovoltaics Technology Brief E11 – January 2013 IEA-ETSAP and IRENA, https://www.irena.org/DocumentDownloads/Publications/IRENA-ETSAP%20Tech%20Brief%20E11%20Solar%20PV.pdf
Bodeker et al 2010
Aluminium and Renewable Energy Systems - Prospects for the Sustainable Generation of Electricity and Heat
http://www.world-aluminium.org/media/filer_public/2013/01/15/fl0000407.pdf
numbers from Table 26 for solar PV ground, Table 49 for CSP
	Framed module	Frameless CdTe module	Notes
Al	38500	31300	Independent estimates, cannot confirm scope includes associated infrastructure other than panels - likely not, but Al in other infra will be minimal
			using the frameless CdTe figure for all thin-film types
BBF Associates, “Market study: current and projected wind and solar renewable electric generating capacity and resulting copper demand”. 2011.
https://copperalliance.org/wp-content/uploads/2017/03/Projected-wind-solar-copper-demand-1.pdf
Numbers for solar from Table 2, wind on Table 1
Most sites were constructed prior to 2010
Numbers converted from lbs/MW to tons/GW
	Springerville, AZ 6.4 MW utility-scale solar plant	Notes
Cu	7000	Report notes future potential to substitute Cu for Al
Fizaine + Court 2015, Appendix A
Renewable electricity producing technologies and metal depletion: A sensitivity analysis using the EROI
https://www.sciencedirect.com/science/article/abs/pii/S0921800914003681
Numbers converted from tons/MW to tons/GW, rounded to nearest ton/GW
	PV single Si	PV multi Si	PV a Si	PV CIGS	PV CdTe	Notes
Ag	59	68				Ostensibly from Ashby, M.F., 2013. Materials and the Environment: Eco-informed Material Choice. Butterworth-Heinemann, Elsevier, 2nd edition (628 pp.) and from EDF private data, cannot conclusively confirm either
Cd			7	265	242	Cannot confirm scope includes associated infrastructure other than panels, likely not
Cr			4000		1000	Numbers differ to a fair degree from other estimates - am excluding this study
Cu	825	943	1005	450	5181
Dy
Ga				124
In			13	55
Mo			11	109	1
Nd
Ni	1	1	334		16
Se				11
Te			8		243
Pihl et al 2012
Material constraints for concentrating solar thermal power
https://www.sciencedirect.com/science/article/abs/pii/S036054421200374X
Numbers from Table 3, sourced from original personal communications
	CSP trough	CSP tower	Notes
Ag	13	16		tons concrete:
Al	0	11000		CSP trough	CSP tower	Notes
Cement	250000	72000	This is cement, not concrete. No grade given.	2607500	750960	Assuming a mix of as in Flury et al 2012: http://esu-services.ch/fileadmin/download/publicLCI/flury-2012-hydroelectric-power-generation.pdf
Cr	2200	3700				1 m^3 of concrete has 2000 kg gravel, 127 kg water, 230 kg cement
Cu	3200	1400				Assume 1 m^3 of concrete weighs 2.4 metric tons
Mg	3000	2600							multiply cement mass by 10.4347826 for concrete mass
Mn	2000	5700		tons cement:
Mo	200	56		CSP trough	CSP tower
Ni	940	1800		250000	72000
Steel	240000	400000
Iron	650000	393000	seems to assume that iron is an input for steel, rather than a structural requirement... yet numbers seem off for that compared to steel
Glass	130000	110000
Silicon sand	92000	81000	input for glass
2018 Månberger and Stenqvist, Global metal flows in the renewable energy transition: Exploring the effects
https://www.sciencedirect.com/science/article/pii/S0301421518302726#ec0005
Number for silver use in conventional PV from page 228
Other numbers in this study cite some of the papers above
tons/GW	c-Si	Notes
Ag	10	Independent calculation based on Elshkaki and Graedel 2013 (https://www.sciencedirect.com/science/article/abs/pii/S0959652613004575) and VDMA, 2017. International Technology Roadmap for Photovoltaic (ITRPV). German Engineering Federation (VDMA), Frankfurt am Main.
		Authors arrived at a range of 10-20 t/GW assuming 20% cell efficiency and 1000 W/m2 and picked lower value.
Jean, J., Brown, P. R., Jaffe, R. L., Buonassisi, T., & Bulović, V. (2015). Pathways for solar photovoltaics. Energy & Environmental Science, 8(4), 1200–1219. doi:10.1039/c4ee04073b
https://pubs.rsc.org/en/content/articlelanding/2015/ee/c4ee04073b#!divAbstract
Numbers from Figure 7, Figure 9, data obtained from authors via email
t/GW	CdTe	CIGS	c-Si (sc-Si and mc-Si)	a-Si	Notes
Cd	29.4						Conversion of tons concrete to tons cement	Concrete volume (m^3)
Te	31.4						Assuming 1600 kg/m^3	39375
Cu		8.22			likely panels only, not plant-wide		Assuming 2500 kg/m^3	25200
In		14.9
Ga		9						Cement (kg)	Cement (tons)
Se		20.4					1600 kg/m^3 density and 165 kg/m^3 cement content	6496875	6496.88
Concrete			63000		US NREL DOE, 2005	https://www.nrel.gov/docs/fy05osti/37656.pdf	2500 kg/m^3 density and 400 kg/m^3 cement content	10080000	10080
Steel			73000		I'm assuming that these were arrived at by dividing the ranges of materials in the original DOE publication by the 4.1 TW of PV capacity installed...
Al			8500
Cu			4900
Si			1460, 2020	58
Glass			50000
Life-Cycle Analysis Results of Geothermal Systems in Comparison to Other Power Systems
https://www.energy.gov/sites/prod/files/2014/02/f7/lifecycle_analysis_of_geothermal_systems.pdf
mt/MW	Solar	Solar	Solar	Solar	Notes:		Conversion of tons concrete to tons cement	Concrete volume (m^3)
	Pacca 2002	Mason 2006	Phylipsen 1995	de Wild 2005	Authors point out that Pacca and Horvath 2002 numbers are high, while Phylipsen and de Wild do not appear to consider material inputs beyond panels		Assuming 1600 kg/m^3	41062.5
Capacity (MW)	4118	3.5	1	1			Assuming 2500 kg/m^3	26280
mt/GW
Aluminum	43200	19000	11400	23000				Cement (kg)	Cement (tons)
Concrete	540000	65700					1600 kg/m^3 density and 165 kg/m^3 cement content	6.77531e+06	6775.31
Cu	117000	7530	170	850	Mason 2006 estimate matches up well with other figure for Springerville, AZ		2500 kg/m^3 density and 400 kg/m^3 cement content	10512000	10512
Steel	1117000	55900
	https://pubs.acs.org/doi/abs/10.1021/es0155884	https://onlinelibrary.wiley.com/doi/abs/10.1002/pip.652
	Table 2	Energy payback and life‐cycle CO2 emissions of the BOS in an optimized 3·5 MW PV installation
		Table 1
Frischknecht, R., Fthenakis, V., Kim, H.C., Raugei, M., Sinha, P., Stucki, M., 2015. Life Cycle Inventories and Life Cycle Assessments of Photovoltaic Systems.
https://www.bnl.gov/pv/files/pdf/226_Task12_LifeCycle_Inventories.pdf
page 31
For a 1.6 sq meter c-Si PV module with a 210 Wp module power, 0.00026 kg of Ni are used.
1 GW/ 210 W = 4761905
4761905*0.00026=1238 kg / GW, not including associated infrastructure
t/GW	c-Si	Notes
Ni	1	Lists no nickel usage for CdTe solar modules
1 t Ni per GW c-Si matches numbers presented in Elshkaki, A., & Graedel, T. E. (2013). Dynamic analysis of the global metals flows and stocks in electricity generation technologies. Journal of Cleaner Production, 59, 260–273. doi:10.1016/j.jclepro.2013.07.003
https://www.sciencedirect.com/science/article/abs/pii/S0959652613004575?via%3Dihub
IRENA 2017
https://www.irena.org/-/media/Files/IRENA/Agency/Publication/2017/Jun/IRENA_Leveraging_for_Solar_PV_2017.pdf
Concrete	47000
Steel	56000
Plastic	6000
Glass	70000
Al	19000
Cu	7000
Silicon	7000
				Conversion of tons concrete to tons cement	Concrete volume (m^3)
				Assuming 1600 kg/m^3	29375
				Assuming 2500 kg/m^3	18800
					Cement (kg)	Cement (tons)
				1600 kg/m^3 density and 165 kg/m^3 cement content	4846875	4846.88
				2500 kg/m^3 density and 400 kg/m^3 cement content	7520000	7520
						4847, 7520 (IRENA 2017);
Rigby P, Fillon B, Gombert A, Herrero Rueda J, Kiel E, Mellikov E, et al. Scientific Assessment in support of the Materials Roadmap enabling Low Carbon Energy Technologies Photovoltaic Technology 2011.
https://publications.jrc.ec.europa.eu/repository/handle/JRC67978
C-Si requires 66,700 tonnes of 4.0 mm glass per GWp of 15% efficient modules
TFPV it requires 160,000 tonnes of glass per GWp
Fthenakis et al., 2011
https://www.bnl.gov/pv/files/pdf/226_Task12_LifeCycle_Inventories.pdf
should be able to calculate Si and glass
this is based on older processes, Si probably not a good figure. Let's use Wp per m^2 values from Frischknecht et al. 2020 below, with a ballpark figure of 10 kg glass per m^2 of c-Si panel from this study, Table 5.1.6
	Wp per m^2	tons/GW
Glass	195	51282.1
Glass	180	55555.6
Average		53418.8
R. Frischknecht, P. Stolz, L. Krebs, M. de Wild-Scholten, P. Sinha, V. Fthenakis, H. C. Kim, M. Raugei, M. Stucki, 2020, Life Cycle Inventories and Life Cycle Assessment of Photovoltaic Systems, International Energy Agency (IEA) PVPS Task 12, Report T12-19:2020.
https://treeze.ch/fileadmin/user_upload/downloads/Publications/Case_Studies/Energy/IEA-PVPS-LCI-report-2020-20201208.pdf
Table 2	% weight Si per module	Weight of unframed module per m^2	Wp per m^2	tons/MW	tons/GW
Mono-Si	5.2	11 kg	195	2.93	2930
Multi-Si	5.6	11.1 kg	180	3.45	3450

## Sheet: Fossil fuels
Material	Coal	NGCC	Biomass	Coal+CCS	NGCC+CCS	Biomass+CCS
Ag	0 (White and Kulcinski 1998);	0	0	0	0	0
Al	624 (Tahara et al 1997); 419 (Spath et al 1999); 255 (White and Kulcinski 1998); 281 (El-Bassioni 1980);	230 (Tahara et al 1997); 204 (Spath and Mann 2000);	1300 (Sullivan et al 2010);	624 (Tahara et al 1997); 419 (Spath et al 1999); 255 (White and Kulcinski 1998); 281 (El-Bassioni 1980);	230 (Tahara et al 1997); 204 (Spath and Mann 2000);	1300 (Sullivan et al 2010);
Cd	0	0	0	0	0	0
Co	0 (El-Bassioni 1980);	0	0	0	0	0
Concrete	178320 (Tahara et al 1997); 158758 (Spath et al 1999); 74257 (White and Kulcinski 1998); 77793, 112485 (El-Bassioni 1980); 102517 (Albers et al 1976);	71270 (Tahara et al 1997); 97749 (Spath and Mann 2000);	159000 (Sullivan et al 2010);	272830 (Tahara et al 1997), 242900 (Spath et al 1999); 113613 (White and Kulcinski 1998); 118105, 172102 (El-Bassioni 1980); 156851 (Albers et al 1976);	109043 (Tahara et al 1997); 149556 (Spath and Mann 2000);	243270 (Sullivan et al 2010);
Cu	454 (White and Kulcinski 1998); 500, 538 (El-Bassioni 1980); 471 (Albers et al 1976);	454 (White and Kulcinski 1998); 500, 538 (El-Bassioni 1980); 471 (Albers et al 1976);	454, 500, 538, 471	545 (White and Kulcinski 1998); 600, 645 (El-Bassioni 1980); 565 (Albers et al 1976);	545 (White and Kulcinski 1998); 600, 645 (El-Bassioni 1980); 565 (Albers et al 1976);	545, 600, 645, 565
Dy	0	0	0	0	0	0
Ga	0	0	0	0	0	0
In	0	0	0	0	0	0
Li	0	0	0	0	0	0
Mn	112 (White and Kulcinski 1998); 124 (El-Bassioni 1980); 199 (Albers et al 1976);	112 (White and Kulcinski 1998); 124 (El-Bassioni 1980); 199 (Albers et al 1976);	112, 124, 199	112 (White and Kulcinski 1998); 124 (El-Bassioni 1980); 199 (Albers et al 1976);	112 (White and Kulcinski 1998); 124 (El-Bassioni 1980); 199 (Albers et al 1976);	112, 124, 199
Nd	0	0	0	0	0	0
Ni	10 (White and Kulcinski 1998); 11 (El-Bassioni 1980); 8 (Albers et al 1976);	10 (White and Kulcinski 1998); 11 (El-Bassioni 1980); 8 (Albers et al 1976);	10, 11, or 8	10 (White and Kulcinski 1998); 11 (El-Bassioni 1980); 8 (Albers et al 1976);	10 (White and Kulcinski 1998); 11 (El-Bassioni 1980); 8 (Albers et al 1976);	10, 11, or 8
Pt	0	0	0	0	0	0
Se	0	0	0	0	0	0
Steel	62200 (Tahara et al 1997); 51340 (Spath et al 1999); 44425 (El-Bassioni 1980);	51130 (Tahara et al 1997); 31030 (Spath and Mann 2000);	52000 (Sullivan et al 2010);	95166 (Tahara et al 1997); 78550 (Spath et al 1999); 61648 (White and Kulcinski); 67695 (El-Bassioni 1980);	78229 (Tahara et al 1997); 47476 (Spath and Mann 2000);	79560 (Sullivan et al 2010);
Te	0	0	0	0	0	0
Cement	18389, 28531 (Tahara et al 1997); 16372, 25401 (Spath et al 1999); 7658, 11881 (White and Kulcinski 1998); 4668, 6749, 11315, 16361 (El-Bassioni 1980); 10572, 16403 (Albers et al 1976)	7350, 11403 (Tahara et al 1997); 10080, 15640 (Spath + Mann 2000)	16397, 25440 (Sullivan et al 2010)	28135, 43653 (Tahara et al 1997); 25049, 38864 (Spath et al 1999); 11716, 18178 (White and Kulcinski 1998); 7141, 10326, 17313, 25033 (El-Bassioni 1980); 16175, 25096 (Albers et al 1976)	8067, 17447 (Tahara et al 1997); 15423, 23929 (Spath + Mann 2000)	25087, 38923 (Sullivan et al 2010);
		Cu, Mn, Ni currently using numbers from coal	based on similarity to coal in scale and design, using numbers for coal where no independent sources available	using Singh et al 2015 increase factor for Steel, concrete (same as steel) and Cu, assuming identical inputs as coal for all other materials	using Singh et al 2015 increase factor for Steel, concrete (same as steel) and Cu, assuming identical inputs as coal for all other materials	using Singh et al 2015 increase factor for Steel, concrete (same as steel) and Cu, assuming identical inputs as coal for all other materials
					Cu, Mn, Ni currently using numbers from coal

## Sheet: Fossil fuels refs and calcs
for biomass thermal: based on similarity to coal in scale and design, using numbers for coal where no independent sources available
for natural gas: for Cu, Mn, Ni am currently using numbers from coal
for CCS: am using Singh et al 2015 derived multiplicative factor for Steel, concrete (same as steel) and Cu, assuming identical inputs as coal for all other materials
GREEN = final values
RED = rejected values
(38) Singh, B.; Bouman, E. A.; Strømman, A. H.; Hertwich, E. G. Material use for electricity generation with carbon dioxide capture and storage: Extending life cycle analysis indices for material accounting. Resour. Conserv. Recycl. 2015, 100, 49–57.
https://www.sciencedirect.com/science/article/abs/pii/S0921344915000555
considering a 600MW hard coal plant with Monoethanolamine (MEA) CO2 capture, hypothetically in western Europe
Numbers from tables 2 and 3
kg/kWh	Conventional coal	Conventional coal _ CCS	Notes		kg, total lifetime	Conventional coal	Conventional coal _ CCS	Notes
Steel	0.0015	0.0023	Study assumptions: 25 year lifetime, 8000 full load hours per year, 42% efficiency without CCS, 41% efficiency with CCS		Steel	180000000	276000000
Cu	2e-05	2.4e-05	8000 hours/year is an unusually high capacity factor - will use		Cu	2400000	2880000
600MW is 600000 kW
Power production per year assuming 57% capacity factor (kWh)	4800000000				metric tons/GW	Conventional coal	Conventional coal _ CCS	Increase with CCS	Notes
Power production over 25 year lifetime (kWh)	120000000000				Steel	300000	460000	1.53333	am using increase factor associated with CCS infrastructure, but not derived numbers
Power production over 25 year lifetime (GWh)	120				Cu	4000	4800	1.2
					Could assume 50% increase in steel usage, 20% increase in copper usage for all CCS?
Tahara et al 1997, cited in Pacca and Horvath 2002, cited in Sullivan et al 2010									Concrete volume (m^3)
EVALUATION OF CO2 PAYBACK TIME OF POWER PLANTS BY LCA								Conversion of tons concrete to tons cement	Coal	NG-CC	With CCS, based on Singh increase factor	With CCS, based on Singh increase factor
https://www.sciencedirect.com/science/article/abs/pii/S0196890497000058				Coal	NG-CC			Assuming 1600 kg/m^3	111450	44543.8	59478.8	48893.1
metric tons/GW	Coal	NG-CC	Notes	With CCS, based on Singh increase factor	With CCS, based on Singh increase factor			Assuming 2500 kg/m^3	71328	28508	109132	43617.2
Steel	62200	51130	Cannot locate, but source cited is UCHIYAMA, Y., YAMAMOTO, H., Energy Analysis on Power Generation Plants, CRIEPIEconomic Research Center, Rep. No. Y90015 (1991)	95166	78228.9				Cement (kg)				Cement (tons)		Coal	NG-CC
Concrete	178320	71270		272830	109043				Coal	NG-CC	With CCS, based on Singh increase factor	With CCS, based on Singh increase factor	Coal	NG-CC	With CCS, based on Singh increase factor	With CCS, based on Singh increase factor
Aluminum	624	230						1600 kg/m^3 density and 165 kg/m^3 cement content	18389250	7.34972e+06	9.81399e+06	8.06736e+06	18389.2	7349.72	9813.99	8067.36
	1000 MW	1000 MW						2500 kg/m^3 density and 400 kg/m^3 cement content	28531200	11403200	43652736	17446896	28531.2	11403.2	43652.7	17446.9
Sullivan et al 2010
Life-Cycle Analysis Results of Geothermal Systems in Comparison to Other Power Systems
https://www.energy.gov/sites/prod/files/2014/02/f7/lifecycle_analysis_of_geothermal_systems.pdf
mt/MW	Biomass	Notes
Aluminum	1.3	"We were unable to find any life cycle assessment studies of conventional biomass power plants that included plant infrastructure data. One study addressed a biomass gasification-to-electricity plant (Mann and Spath 1997); however, as no such facility is in operation at this time, it is not included herein. Instead, we have combined results of two studies to represent a conventional thermoelectri…
Concrete	159
Steel+iron	52
								Concrete volume (m^3)
	Biomass-88	Biomass w CCS based on Singh et al 2015 factors					Conversion of tons concrete to tons cement	Biomass-88	Biomass w CCS based on Singh et al 2015 factors
Capacity (MW)	88.5	independent estimate based partially on Spath et al 1999, see note above					Assuming 1600 kg/m^3	99375	152044
mt/GW							Assuming 2500 kg/m^3	63600	97308
Aluminum	1300							Cement (kg)		Cement (tons)
Concrete	159000	243270						Biomass-88	Biomass w CCS based on Singh et al 2015 factors	Biomass-88	Biomass w CCS based on Singh et al 2015 factors
Steel+iron	52000	79560					1600 kg/m^3 density and 165 kg/m^3 cement content	16396875	2.50872e+07	16396.9	25087.2
							2500 kg/m^3 density and 400 kg/m^3 cement content	25440000	38923200	25440	38923.2
Spath, P.L., M.K. Mann, and D.R. Kerr, 1999, ―Life Cycle Assessment of Coal-Fired Power Production,‖ NREL/TP-570-25119.
https://www.nrel.gov/docs/fy99osti/25119.pdf								Concrete volume (m^3)
Table 18, cites DynCorp, 1995, Meridian 1989, 360MW plant							Conversion of tons concrete to tons cement	Coal	With CCS, based on Singh increase factor
tons/GW or kg/MW capacity	Coal	Sensitivity (Table 42)	With CCS, based on Singh increase factor				Assuming 1600 kg/m^3	99223.8	151812
Concrete	158758	6962	242900				Assuming 2500 kg/m^3	63503.2	97159.9
Steel+iron	51340	1764	78550.2					Cement (kg)		Cement (tons)
Al	419	310						Coal	With CCS, based on Singh increase factor	Coal	With CCS, based on Singh increase factor
DynCorp EENSP, Inc. (1995). Assessment of the Environmental Benefits of Renewables Deployment: A Total Fuel Cycle Analysis of the Greenhouse Gas Impacts of Renewable Generation Technologies in Regional Utility Systems. Prepared for the National Renewable Energy Laboratory, contract no. DE-AC02-83CH10093, May.	CANNOT FIND						1600 kg/m^3 density and 165 kg/m^3 cement content	1.63719e+07	2.5049e+07	16371.9	25049
Meridian Corporation. (1989). Energy System Emissions and Material Requirements, for the U.S. Department of Energy, Deputy Assistant Secretary for Renewable Energy, Washington, D.C., February.	CANNOT FIND						2500 kg/m^3 density and 400 kg/m^3 cement content	25401280	3.8864e+07	25401.3	38864
White, S.W., and G.L. Kulcinski, 1998a, ―Birth to Death Analysis of the Energy Payback Ratio and CO2 Gas Emission Rates From Coal, Fission, Wind and DT Fusion Electrical Power Plants,‖ UWFDM-1063.
https://www.sciencedirect.com/science/article/abs/pii/S0920379600001587
Table 4, citing reference 11 for coal, reference 12 for fission								Concrete volume (m^3)
tons/GW	Coal	Fission	With CCS, based on Singh increase factor				Conversion of tons concrete to tons cement	Coal	With CCS, based on Singh increase factor
Al	255	18					Assuming 1600 kg/m^3	46410.6	71008.3
Concrete	74257	179681	113613				Assuming 2500 kg/m^3	29702.8	45445.3
Cu	454	729	544.8					Cement (kg)		Cement (tons)
Mn	112	434						Coal	With CCS, based on Singh increase factor	Coal	With CCS, based on Singh increase factor
Ni	10	125					1600 kg/m^3 density and 165 kg/m^3 cement content	7.65775e+06	1.17164e+07	7657.75	11716.4
Ag	0	0.5					2500 kg/m^3 density and 400 kg/m^3 cement content	11881120	1.81781e+07	11881.1	18178.1
carbon/low alloy + stainless steel	40293	36068	61648.3
ref 11:	A.A. El-Bassioni, A methodology and a preliminary data base for examining the health risks of electricity generation from uranium and coal fuels, Oak Ridge National Laboratory, NUREG/CR-1539, August (1980).
ref 12:	R.H. Bryan, I.T. Dudley, Estimated quantities of materials contained in a 1000 MW(e) PWR Power Plant, Oak Ridge National Laboratory, TM-4515, June (1974).
Spath, P.L., and M.K. Mann, 2000, ―Life Cycle Assessment of a Natural Gas Combined-Cycle Power Generation System,‖ NREL/TP-570-27715.
https://www.nrel.gov/docs/fy00osti/27715.pdf								Concrete volume (m^3)
Table 2, citing DynCorp 1995							Conversion of tons concrete to tons cement	NG-CC	NG-CC, CCS using Singh et al 2015 factors
tons/GW or kg/MW capacity	NG-CC	NG-CC, CCS using Singh et al 2015 factors					Assuming 1600 kg/m^3	61093.1	93472.5
Concrete	97749	149556					Assuming 2500 kg/m^3	39099.6	59822.4
Steel	31030	47475.9						Cement (kg)		Cement (tons)
Al	204							NG-CC	NG-CC, CCS using Singh et al 2015 factors	NG-CC	NG-CC, CCS using Singh et al 2015 factors
DynCorp EENSP, Inc. (1995). Assessment of the Environmental Benefits of Renewables Deployment: A Total Fuel Cycle Analysis of the Greenhouse Gas Impacts of Renewable Generation Technologies in Regional Utility Systems. Prepared for the National Renewable Energy Laboratory, contract no. DE-AC02-83CH10093, May.	CANNOT FIND						1600 kg/m^3 density and 165 kg/m^3 cement content	1.00804e+07	1.5423e+07	10080.4	15423
							2500 kg/m^3 density and 400 kg/m^3 cement content	15639840	2.3929e+07	15639.8	23929
(9) Moss, R. L.; Tzimas, E.; Willis, P.; Arendorf, J.; Thompson, P.; Chapman, A.; Morley, N.; Sims, E.; Bryson, R.; Peason, J. Critical metals in the path towards the decarbonisation of the EU energy sector. Assessing rare metals as supply-chain bottlenecks in low-carbon energy technologies. JRC Report EUR. 2013.
https://setis.ec.europa.eu/sites/default/files/reports/CriticalMetalsinStrategicEnergyTechnologies-def.pdf
kg/MW	CCS	Notes
Ni	1145	mostly independent estimates based on similar infrastructure
Mn	3761
Co	7.5
Cu	692
A.A. El-Bassioni, A methodology and a preliminary data base for examining the health risks of electricity generation from uranium and coal fuels, Oak Ridge National Laboratory, NUREG/CR-1539, August (1980).
https://www.osti.gov/servlets/purl/5100383									Coal, CCS
Table 4.21	Coal, 800 MWe	Notes						Coal, tons/GW	low, using Singh et al 2015 factors	high, using Singh et al 2015 factors
Al	225	"lncludes material to manufacture major equipment items."					Al	281.25					Conversion to tons of cement
Cu	400-430 (c)	(b)Federal Energy Administration, 11 Project Independence Blue Print Final Task Force Report: Facilities, 11 November 1974.					Cu	500 to 537.5	600	645			Coal, low	Coal, high	Coal w CCS low, using Singh et al 2015 factors	Coal w CCS high, using Singh et al 2015 factors	Coal, low	Coal, high	Coal w CCS low, using Singh et al 2015 factors	Coal w CCS high, using Singh et al 2015 factors
Concrete (CUBIC YARDS)	37000 (d)-53500	https://www.osti.gov/servlets/purl/7269803					Concrete, metric tons (assuming 2.75 metric tons/m^3	77793 to 112485	118105	172102		kg of cement, assuming cement content of 165 g/m^3	4.66761e+06	6.74911e+06	7.14144e+06	1.03261e+07	4667.61	6749.11	7141.44	10326.1
Steel+steel pipe & tube+stainless steel+steel forgings	35540			Concrete, cubic meters			Steel+steel pipe & tube+stainless steel+steel forgings	44425	67694.9			kg of cement, assuming cement content of 400 g/m^3	11315414	16361477	1.73126e+07	2.50331e+07	11315.4	16361.5	17312.6	25033.1
Mn	99			28288.5	40903.7		Mn	123.75				using original figures for concrete volume, in cubic meters
Ni	9			Concrete, metric tons (assuming 2.75 metric tons/m^3			Ni	11.25
Co	0			77793.5	112485		Co	0
(c)J.P. Albers et al., "Demand for Non-fuel Minerals and Materials by U.S. Energy Industry 1975-1990," Geological Survey, U.S. Department of the Interior, 1976.
(d)Tennessee Valley Authority, "The Bull Run Steam Plant," .Technical Report 38, 1967.
J.P. Albers et al., "Demand for Non-fuel Minerals and Materials by U.S. Energy Industry 1975-1990," Geological Survey, U.S. Department of the Interior, 1976.
https://pubs.er.usgs.gov/publication/pp1006AB								Concrete volume (m^3)
Table 13, column A, 900 MWe steam turbine fossil fuel (coal?) plant			Coal, CCS				Conversion of tons concrete to tons cement	Coal	Coal w CCS using Singh et al 2015 factors
	metric tons	tons/GW	using Singh et al 2015 factors				Assuming 1600 kg/m^3	64072.9	98031.6
Concrete	92265	102517	156850				Assuming 2500 kg/m^3	41006.7	62740.2
Cu	424	471.111	565.333					Cement (kg)		Cement (tons)
Mn	179	198.889						Coal	Coal w CCS using Singh et al 2015 factors	Coal	Coal w CCS using Singh et al 2015 factors
Ni	6.8	7.55556					1600 kg/m^3 density and 165 kg/m^3 cement content	1.0572e+07	1.61752e+07	10572	16175.2
							2500 kg/m^3 density and 400 kg/m^3 cement content	1.64027e+07	25096080	16402.7	25096.1

## Sheet: Nuclear
Material	Nuclear
Ag	1 (Bryan + Dudley 1974); 1 (El-Bassioni 1980); 1 (USNRC, 1977);
Al	18 (Bryan + Dudley 1974); 54, 45 (El-Bassioni 1980); 33 (USNRC, 1977);
Cd	0 (USNRC, 1977);
Co	0
Concrete	381200, 351481 (Peterson et al 2005); 179684 (Bryan + Dudley 1974); 190000 (El-Bassioni 1980);
Cu	1345 (Fizaine + Court 2015); 726 (Bryan + Dudley 1974); 907, 2000 (El-Bassioni 1980); 1481 (USNRC, 1977);
Dy	0
Ga	0
In	0
Li	0
Mn	467 (Bryan + Dudley 1974); 209, 400 (El-Bassioni 1980); 296 (USNRC, 1977);
Nd	0
Ni	300 (Fizaine + Court 2015); 484 (Bryan + Dudley 1974); 49, 100 (El-Bassioni 1980); 74 (USNRC, 1977);
Pt	0
Se	0
Steel	44821, 43206 (Peterson et al 2005); 36068 (Bryan + Dudley 1974); 10000 (El-Bassioni 1980); 7407 (USNRC, 1977); 50400 (Andreades et al 2014)
Te	0
Cement	22872, 55447, 21089, 51125 (Peterson et al 2005); 30133 (Bryan + Dudley 1974); 19600, 30400 (El-Bassioni 1980); 39590, 61424 (Andreades et al 2014)

## Sheet: Nuclear refs and calcs
GREEN = final values
RED = rejected values
Per Peterson et al (2005):
Metal And Concrete Inputs For Several Nuclear Power Plants
https://pdfs.semanticscholar.org/519e/a5c55a312f3f45ccfcc4a093a941366c6658.pdf
1380 MWe ABWR in Table 3, 1500 MWe ESBWR in Table 4, 1600 MWe EPR in Table 5, 286 MW GR-MHR in Table 6, 1235 MW AHTR-IT in Table 7								Conversion of tons concrete to tons cement
	1380 MWe ABWR	1500 MWe ESBWR	1600 MWe EPR	286 MWe GT-MHR	1235 MW AHTR-IT	Notes			Cement (kg)		Cement (tons)		Cement (tons/GW)
Concrete, cubic meters	191293	104231	204498	21816	51508	"The 1970’s PWR non-structural steel mass was scaled to estimate the EPR equipment steel mass, using the same scaling factor defined earlier. A similar procedure is used to estimate the ABWR and ESBWR non-rebar steel, but with modifications made to incorporate BWR differences, including removing the steam generator account, directly calculating the mass of the larger BWR reactor pressure vessel, …			1380 MWe ABWR	1600 MWe EPR
Total metal	63439	50099	70903	7707	19348	"For steel masses, estimates of structural steel quantities are not as accurate as the concrete volume estimates for the corresponding structure, due to the uncertainty in the rebar mass fraction in reinforced concrete. Also, while the scaled data used to compute steel quantities used in plant equipment provide a useful figure, they are not as accurate as a detailed evaluation of the steel input …		kg of cement, assuming cement content of 165 g/m^3	31563345	33742170	31563.3	33742.2	22872	21088.9
Concrete, metric tons (assuming 2.75 metric tons/m^3)	526056	286635	562370	59994	141647	Essentially, these are scaled estimates using Bryan and Dudley 1974 and United Engineers and Constructors Inc "Pressurized Water Reactor Plant" (the latter of which Bryan and Dudley 1974 used)		kg of cement, assuming cement content of 400 g/m^3	76517200	81799200	76517.2	81799.2	55447.2	51124.5
Steel and iron, metric tons as a fraction of total metal, assuming 97.5%	61853	48846.5	69130.4	7514.32	18864.3	Treating these as valid estimates, as they reflect different reactor types in service
Concrete, tons/GW	381200	191090	351481	209769	114694
Steel, tons/GW	44821	32564.3	43206.5	26273.9	15274.7
	Operational	Not yet built	Operational	in development	Not yet built
From Results and discussion:
Steel (MT/MWe)		33		27
Concrete (m^3/MWe)		69
Based on tables:
Steel (MT/MWe)	45.9703	33.3993	44.3144	26.9476	15.6664
Concrete (m^3/MWe)	138.618	69.4873	127.811	76.2797	41.7069
Fizaine + Court 2015, Appendix A
Renewable electricity producing technologies and metal depletion: A sensitivity analysis using the EROI
https://www.sciencedirect.com/science/article/abs/pii/S0921800914003681
Numbers converted from tons/MW to tons/GW, rounded to nearest ton/GW
	Nuclear power (PWR)
Cr	350
Cu	1345
Ni	300
White, S.W., and G.L. Kulcinski, 1998a, ―Birth to Death Analysis of the Energy Payback Ratio and CO2 Gas Emission Rates From Coal, Fission, Wind and DT Fusion Electrical Power Plants,‖ UWFDM-1063.
https://www.sciencedirect.com/science/article/abs/pii/S0920379600001587
Table 4, citing reference 11 for coal, reference 12 for fission
tons/GW	Fission
Al	18
Concrete	179681
Cu	729
Mn	434
Ni	125
Ag	0.5
carbon/low alloy + stainless steel	36068
ref 12:	R.H. Bryan, I.T. Dudley, Estimated quantities of materials contained in a 1000 MW(e) PWR Power Plant, Oak Ridge National Laboratory, TM-4515, June (1974).
R.H. Bryan, I.T. Dudley, Estimated quantities of materials contained in a 1000 MW(e) PWR Power Plant, Oak Ridge National Laboratory, TM-4515, June (1974).
https://inis.iaea.org/collection/NCLCollectionStore/_Public/05/148/5148861.pdf
Cites reference 1 for many cases, for others equipment catalogs, personal communications, technical journals consulted
metric tons/GW	Typical 1000 MW PWR, Table 1 - composite materials
Al	18
Carbon steel + stainless steel + galvanized iron	36068
Concrete - CUBIC YARDS	98130	179681.06 metric tons according to Appendix B
Cu	694
Ni	1
Ag	<1
metric tons.GW	Typical 1000 MW PWR, Table 2 - basic constituent materials	Notes
Al	18	Assumed constituents in Appendix C
Cu	726				tons of cement / GW
Mn	467				30133
Ni	484
Ag	<1
Cement	30133	Concrete: Cement 16.77, coarse aggregate 50.29, fine aggregate 25.52 by weight %
Concrete	179684
1. United Engineers and Constructors Inc., "Pressurized Water Reactor Plant," 1000-MWe Central Station Power Plants Investment Cost Study, Vol.1, USAEC Report WASH-1230 (Vol. I), June 1972.
https://books.google.com/books/about/Pressurized_Water_Reactor_Plant.html?id=dzFIAQAAMAAJ
probably derived from Estimate of Cost
breakdown by system in Appendix B
(9) Moss, R. L.; Tzimas, E.; Willis, P.; Arendorf, J.; Thompson, P.; Chapman, A.; Morley, N.; Sims, E.; Bryson, R.; Peason, J. Critical metals in the path towards the decarbonisation of the EU energy sector. Assessing rare metals as supply-chain bottlenecks in low-carbon energy technologies. JRC Report EUR. 2013.
https://setis.ec.europa.eu/sites/default/files/reports/CriticalMetalsinStrategicEnergyTechnologies-def.pdf
Table 4 and Table A11 for nuclear, Table 8 and Appendix A.2.5 for CCS
Reactors to be built in Europe were assumed to be either Westinghouse AP1000 or Areva EPR designs. Therefore wherever possible, material inventories were obtained from documents concerning these designs: www.areva.com, www.ukap1000application.com
Solar bakes in an assumed mix, wind bakes in an assumed mix, neither includes associated infrastructure
tons/MWe	Nuclear	Notes	tons/GWe
Cu	0.0596	Trojan plant, may not include all infrastruxture	59.6	low
In	0.0016	AP1000, in control rods	1.6
Ni	0.2555	Trojan plant, may not include all infrastruxture	255.5
Ag	0.0083	AP1000	8.3
Cd	0.0005	AP1000	0.5
A.A. El-Bassioni, A methodology and a preliminary data base for examining the health risks of electricity generation from uranium and coal fuels, Oak Ridge National Laboratory, NUREG/CR-1539, August (1980).
https://www.osti.gov/servlets/purl/5100383
Table 3.59:											Concrete volume (m^3)
metric tons for a 1000 MW plant	PWR	BWR	1000 MWe Model LWR (based on a 2:1 ratio of PWR to BWR requirements, for a range of values the average was utilized. Values rounded, represent a 30 year lifetime of the plant)	Notes			BWR (c)	BWR (d)		Conversion of tons concrete to tons cement	BWR
Al	18-45 (a,f)	45-54 (d,c)	40	Am using numbers for BWR columns only, treating ranges of values as two separate estimates			54	45		Assuming 1600 kg/m^3	118750
Cd	<1 (a,f)	<1 (d)	<1					<1		Assuming 2500 kg/m^3	76000
Concrete	170000	1.9e5 (c)	1.8et				190000				Cement (kg)	Cement (tons)
Cu	726-2000 (a,f)	907-2000 (c,d)	1390				907	2000			BWR	BWR
Mn	400-467 (f,a)	209-400 (c,d)	390				209	400		1600 kg/m^3 density and 165 kg/m^3 cement content	19593750	19593.8
Ni	100-484 (f,a)	49-100 (c,d)	220				49	100		2500 kg/m^3 density and 400 kg/m^3 cement content	30400000	30400
Ag	<1 (f,a)	1 (d)	<1					1
Steel	1-5.4e5 (f,g)	1.0e4 (d)	19000					10000
(a)R. H. Bryan and I. T. Dudley, 11 Estimated Quantities of Materials Contained in a1000-MWe PWR Power Plant, 11 ORNL-TM-4515, June 1974.							only using BWR numbers, since PWR numbers are from Bryan and Dudley which is already included
CANNOT FIND ONLINE - (b)Federal Energy Administration, 11 P~oject Independence Blueprint.Task · . Force Report/Nuclear Energy, 11 Final Task Force Report, 1974.
(c)J. P. Albers, et al., 11 Demand and.Supply of Non-Fuel Minerals and Materials for the United States Energy Industry, 1975-90, 11 USGS Professional Paper 1006-~, 1976.
(d)u.s. Nuclear Regulatory Commission, 11 Phipps Bend Nuclear Plant Units 1 and 2, Proposed by the Tennessee Valley Authority, 11 Final Environmental Statement, NUREG-0168, February 1977.
(f)U.S. Nu~lear Regulatory Commission, 11Yellow Creek Nuclear Plant Units 1 and 2, Proposed by the Tennessee Valley Authority, 11 Final Environmental Statement, November 1977.
g)U. S. Department of Energy, 11Technology for Commercial Radioactive Waste Management, II DOE/ET-0028, vo·l. 1, May 1979 ..
PWR
U.S. Nuclear Regulatory Commission, Yellow Creek Nuclear Plant Units 1 and 2, Proposed by the Tennessee Valley Authority, Final Environmental Statement, November 1977.
https://catalog.hathitrust.org/Record/101828841
page 220, section 10.3.3, assembled from "various sources" for a two-unit plant with same power rating as Yellow Creek
metric tons	PWR, ~2700 MWe	tons/GW (rounded to nearest integer)	Notes
Al	90	33
Cd	0.005	0
Cu	4000	1481
Mn	800	296
Ni	200	74
Ag	2	1
Steel	20000	7407	seems low
BWR
CANNOT FIND ONLINE - U.S. Nuclear Regulatory Commission, Phipps Bend Nuclear Plant Units 1 and 2, Proposed by the Tennessee Valley Authority, Final Environmental Statement, NUREG-0168, February 1977
BWR
J. P. Albers et al., Demand and Supply of Non-Fuel Minerals and Materials for the United States Energy Industry, 1975-90, USGS Professional Paper 1006, 1976.
Table 24
metric tons for a plant of 1000 MWe capacity	BWR	PWR
Al	54	18
Concrete	190175	166349
Cu	907	726
In
Mn	209	467
Ni	49	484
		Adapted from Bryan and Dudley 1974, p5
US DOE Quadrennial Energy Tech Review, 2015
https://www.energy.gov/sites/prod/files/2017/03/f34/qtr-2015-chapter10.pdf
Table 10.4
Inputs per power delivered (tonnes material/TWh)	Coal	NGCC	Nuclear PWR	Biomass	Notes
Al	3	1	0	6	Excluding from consideration, as exact source is unclear and use of these numbers requires guessing the DOE's implicit lifetime and capacity assumptions
Cement	0	0	0	0
Concrete	870	400	760	760
Cu	1	0	3	0
Steel	310	170	160	310
cite source 52: Ibid, where source 51 is Argonne National Laboratory. “GREET 2 2014.” 2014. Available at: https://greet.es.anl.gov.
Technical Description of the “Mark 1” Pebble-Bed Fluoride-Salt-Cooled High-Temperature Reactor (PB-FHR) Power Plant
2014
Andreades et al
converted from 1000 kg/MWe to tons/GWe
tons/GW	Mk 1 PB-FHR (100 MWe), scaled to 1GW
Carbon steel + High alloy and stainless steel	50400			Concrete volume (m^3)
Concrete	383900		Conversion of tons concrete to tons cement	Mk 1 PB-FHR (100 MWe)
			Assuming 1600 kg/m^3	239938
			Assuming 2500 kg/m^3	153560
				Cement (kg)	Cement (tons)
				Mk 1 PB-FHR (100 MWe)	Mk 1 PB-FHR (100 MWe)
			1600 kg/m^3 density and 165 kg/m^3 cement content	3.95897e+07	39589.7
			2500 kg/m^3 density and 400 kg/m^3 cement content	61424000	61424

## Sheet: Hydro
Material	Storage	ROR
Al	52 (Pacca + Horvath 2002);
Concrete	10533000 (Flury + Frischknecht 2012); 7644000 (Pacca + Horvath 2002); 552000 (Hondo 2005); 6680000 (Rule 2009);	5766000 (Flury + Frischknecht 2012);
Cr	1500 (Fizaine + Court 2015);
Cu	2970 (Flury + Frischknecht 2012); 1502 (Rule 2009); 1050 (Fizaine + Court 2015)	2970 (Flury + Frischknecht 2012);
Mo	250 (Fizaine + Court 2015);
Steel	78000 (Flury + Frischknecht 2012); 24800 (Pacca + Horvath 2002); 54500 (Rule 2009);	177000 (Flury + Frischknecht 2012);
Cement	1086216, 1685280, 594619, 922560 Flury + Frischknecht 2012; 788288, 1223040 (Pacca + Horvath 2002); 688875, 1068800 (Rule 2009)

## Sheet: Hydro refs and calcs
GREEN = final values
RED = rejected values
Flury + Frischknecht 2012
Intensity [ton/GW]				in g/kWh			kWh/GWh	1000000			Concrete volume (m^3)
http://esu-services.ch/fileadmin/download/publicLCI/flury-2012-hydroelectric-power-generation.pdf										Conversion of tons concrete to tons cement	Storage Power Station	Run of River
Material	Storage Power Station	Run of River (RoR)		Storaged	Run of River		ton/g	1e-06		Assuming 1600 kg/m^3	6583125	3603750
Concrete	10533000	5766000		35.11	19.22		Assumed Life	150 years		Assuming 2500 kg/m^3	4213200	2306400
Steel	78000	177000		0.26	0.59		Assumed plant size	95 MW			Cement (kg)		Cement (tons)
Copper (Cu)	2970	2970		0.0099	0.0099		Assumed production	190GWh/year			Storage Power Station	Run of River	Storage Power Station	Run of River
										1600 kg/m^3 density and 165 kg/m^3 cement content	1086215625	594618750	1.08622e+06	594619
https://www.energy.gov/sites/prod/files/2014/02/f7/lifecycle_analysis_of_geothermal_systems.pdf	Pacca 2002	Hondo 2005	Rule 2009			Concrete volume (m^3)				2500 kg/m^3 density and 400 kg/m^3 cement content	1685280000	922560000	1685280	922560
Aluminum	52	n/a	n/a		Conversion of tons concrete to tons cement	Pacca 2002	Hondo 2005	Rule 2009
Concrete	7644000	552000	6680000		Assuming 1600 kg/m^3	4777500	345000	4175000
Copper	69 (seems very low)	n/a	1502		Assuming 2500 kg/m^3	3057600	220800	2672000
Steel	24800	n/a	54500			Cement (kg)			Cement (tons)
						Pacca 2002	Hondo 2005	Rule 2009	Pacca 2002	Hondo 2005	Rule 2009
Fizaine + Court 2015, Appendix A					1600 kg/m^3 density and 165 kg/m^3 cement content	788287500	56925000	688875000	788288	56925	688875
Renewable electricity producing technologies and metal depletion: A sensitivity analysis using the EROI					2500 kg/m^3 density and 400 kg/m^3 cement content	1223040000	88320000	1068800000	1223040	88320	1068800
https://www.sciencedirect.com/science/article/abs/pii/S0921800914003681										seems quite low, omitting these
Numbers converted from tons/MW to tons/GW, rounded to nearest ton/GW
	Hydro
Cr	1500
Cu	1050
Mo	250
Three gorges dam (sanity check, not included in study)		Concrete (kg)
27.2 million m3 concrete	Assuming 1600 kg/m^3	43520000000
463,000 tons steel	Assuming 2500 kg/m^3	68000000000
https://www.britannica.com/topic/Three-Gorges-Dam		Cement (kg)	Cement (tons)	Cement (tons/GW)	Three Gorges Dam is 22.5 GW
http://www.china-embassy.org/eng/zt/sxgc/t36512.htm	1600 kg/m^3 density and 165 kg/m^3 cement content	4488000000	4488000	199467
	2500 kg/m^3 density and 400 kg/m^3 cement content	10880000000	10880000	483556
		Steel (tons/GW)
		20577.8

[truncated: 3 more sheets: Geothermal, Geothermal refs and calcs, Concrete assumptions]
