# Supplementary material for: Materials demand for electricity in climate mitigation scenarios
Source: Research Square preprint supplement (doi:10.21203/rs.3.rs-1229622/v1), 2022-02-23
Supplement: Supplementary file 4 [file d394e55ff91549467d3cb1c0.xlsx]

## Sheet: Global production by region
Materials produced in Japan and Korea are accounted for separately compared to rest-of-Asia, assuming OECD CO2 and energy intensities
Allocate CO2 emissions and energy footprint for all primary production based on regional values and shares of production
Assume global average CO2 emissions and energy footprint for remaining production from "Other" category
Assume uniform recycled carbon/energy intensity globally for all recycled input production
Icelandic production assumed to count towards the OECD regional total
% production by region	Ag	Al	Cd	Cement	Cu	Dy	Fiberglass	Ga	Glass	In	Mn	Nd	Ni	Se	Si	Steel	Te
ASIA	13.3	61.78	32.8	63.7	9.7	74.93	71.12	95.67	65	39.5	15.4	74.93	57.34	33.1	78	64.5	61.7
LAM	50.9	0	8.6	1.3	43.85	0.46	0	0	3	1.3	7.3	0.46	4.39	1.6	0	2.5	0
MAF	0	6.39	0	0	10.4	1.22	0	0	7	0	50.9	1.22	0	0	0	3.1	1
OECD	15.1	12.5	38.4	6	11.3	22.06	28.88	1.852	19	58.6	16.8	22.06	13.9	56.76	22	22.1	27.6
REF	7.8	6	9.6	1.3	7.25	1.2	0	2.468	5	0.6	3.8	1.2	10	5.3	0	5.6	8.5
Other	12.9	13.33	10.6	27.7	17.5	0.13	0	0.01	1	0	5.8	0.13	14.37	3.24	0	2.2	1.2
Source	https://pubs.er.usgs.gov/publication/mcs2020	https://pubs.er.usgs.gov/publication/mcs2020	https://pubs.er.usgs.gov/publication/mcs2020	https://pubs.er.usgs.gov/publication/mcs2020	https://pubs.er.usgs.gov/publication/mcs2020	Assuming percentages for overall rare earth mine production from: https://pubs.er.usgs.gov/publication/mcs2020	360 Research Reports, "Global Fiberglass Market Research Report 2020"	https://pubs.er.usgs.gov/publication/mcs2020	https://www.statista.com/statistics/702188/flat-glass-production-share-globally-by-region/	https://pubs.er.usgs.gov/publication/mcs2020	https://pubs.er.usgs.gov/publication/mcs2020	Assuming percentages for overall rare earth mine production from: https://pubs.er.usgs.gov/publication/mcs2020	https://pubs.er.usgs.gov/publication/mcs2020		IEA, Life Cycle Inventories and Life Cycle Assessments of Photovoltaic Systems	https://www.worldsteel.org/en/dam/jcr:96d7a585-e6b2-4d63-b943-4cd9ab621a91/World%2520Steel%2520in%2520Figures%25202019.pdf
																https://pubs.er.usgs.gov/publication/mcs2020

## Sheet: World production_v1.0
Variable	Ag	Al	Cd	Cement	Cu	Dy	Fiberglass	Ga	Glass	In	Mn	Nd	Ni	Se	Si	Steel	Te
Production	25000	60000000	23000	4100000000	19700000	1800	4762000	555	75400000	720	16000000	21000	2100000	3300	468000	1870000000	420
Reserve	530000	30000000000	500000	0	790000000	1100000	0	110000	0	15000	680000000	12800000	74000000	100000	0	0	31000
Resource	1308000	75000000000	6000000	0	3500000000	1980000	0	1000000	0	47000	17273000000	23040000	130000000	171000	0	0	48000
Source1	Manberger + Stenqvist 2018	Dominish et al 2019	Dominish et al 2019	https://www.iea.org/reports/cement	Manberger + Stenqvist 2018	Dominish et al 2019	Mazumdar et al., 2019	Manberger + Stenqvist 2018		Manberger + Stenqvist 2018	Dominish et al 2019	Manberger + Stenqvist 2018	Manberger + Stenqvist 2018	Manberger + Stenqvist 2018	https://www.globenewswire.com/news-release/2019/05/24/1843135/0/en/Global-and-China-Polysilicon-Industry-Report-2019-2023.html	https://www.bir.org/publications/facts-figures/download/643/175/36?method=view	Manberger + Stenqvist 2018
Source2	Manberger + Stenqvist 2018	Dominish et al 2019	Dominish et al 2019	NA	Manberger + Stenqvist 2018	Dominish et al 2019	NA	Dominish et al 2019		Manberger + Stenqvist 2018	Dominish et al 2019	Dominish et al 2019	Manberger + Stenqvist 2018	Manberger + Stenqvist 2018	NA	NA	Manberger + Stenqvist 2018
Source3	Dominish et al 2019	Dominish et al 2019	Dominish et al 2019	NA	Dominish et al 2019	Dominish et al 2019	NA	Dominish et al 2019		Dominish et al 2019	https://pubs.usgs.gov/pp/1802/l/pp1802l.pdf	Dominish et al 2019	Dominish et al 2019	Dominish et al 2019	NA	NA	Dominish et al 2019

## Sheet: Recycling rates
Material	Ag	Al	Cd	Cement	Cu	Dy	Fiberglass	Ga	Glass	In	Mn	Nd	Ni	Se	Si	Steel	Te
Current input recycling rate (secondary production as a fraction of all inputs)	0.21	0.35	0	0	0.16	0	0	0	0.4	0	0	0	0.35	0	0	0.24	0
Source	Nuss + Eckelman 2014	UNEP 2011	Assumed	NA	Nuss + Eckelman 2014	Assumed	Assumed	Assumed	Burrows + Fthenakis 2013	Assumed	Assumed	Assumed	UNEP 2011	Assumed	Assumed	Bureau of International Recycling, 2020	Assumed

## Sheet: Master - CO2 intensity by mater
	Ag	Al	Cd	Cement	Cu	Dy	Fiberglass	Ga	Glass	In	Mn	Nd	Ni	Se	Si	Steel	Te
ASIA	246000	15890	3000	863.25	3463.6	59600	1303	205000	1069	102000	1000	17600	9700	3600	658500	2148	21900
LAM	110570	7000	3000	665.5	2563.64	59600	1303	205000	1069	102000	1000	17600	9700	3600	658500	1080	21900
MAF	246000	15000	3000	671.333	6433.33	59600	1303	205000	1069	102000	1000	17600	9700	3600	658500	2203	21900
OECD	190535	5000	3000	798.2	3563.64	59600	1303	205000	1069	102000	1000	17600	9700	3600	658500	1678	21900
REF	246000	12200	3000	790	2500	59600	1303	205000	1069	102000	1000	17600	9700	3600	658500	1744.17	21900
Other	246000	12200	3000	771.933	3200	59600	1303	205000	1069	102000	1000	17600	9700	3600	658500	1744.17	21900
Recycled	15100	1170	0	0	1000	0	1303	0	1069	0	0	0	700	0	0	283	0

## Sheet: Ag
Using a regional approach, assuming that ASIA, MAF, REF silver production are in line with the global average CO2 intensity
This is motivated by the finding that silver carbon intensity from LAM regional production (50% world production), global average are potentially quite different
This is tricky: There is one source for LAM, one source for OECD besides N+E. N+E cite three LCAs for primary Ag production from OECD processes
Thus, the "global average" from N+E is also essentially an OECD average
Primary:
	Material	kg CO2/ton	Region	Source	Link	Notes
1	Ag	110570	LAM	Ecoinvent, 2009 in Usapein + Tongcumpou 2016	https://www.researchgate.net/publication/298235548_Greenhouse_Gas_Emission_in_Jewelry_Industry_A_Case_Study_of_Silver_Flat_Ring
2	Ag	61740	OECD	Ecoinvent, 2009 in Usapein + Tongcumpou 2016	https://www.researchgate.net/publication/298235548_Greenhouse_Gas_Emission_in_Jewelry_Industry_A_Case_Study_of_Silver_Flat_Ring
3	Ag	246000	Global average	Nuss + Eckelman 2014	https://journals.plos.org/plosone/article?id=10.1371/journal.pone.0101298	Weighted average of below processes, as calculated from Table S38 of Nuss + Eckelman 2014
4	Ag	240000	OECD	Nuss + Eckelman 2014	https://journals.plos.org/plosone/article?id=10.1371/journal.pone.0101298
5	Ag	55400	OECD	Nuss + Eckelman 2014	https://journals.plos.org/plosone/article?id=10.1371/journal.pone.0101298
6	Ag	405000	OECD	Nuss + Eckelman 2014	https://journals.plos.org/plosone/article?id=10.1371/journal.pone.0101298
Secondary:
	Material	kg CO2/ton	Region	Source	Link
1	Ag	14500		Ecoinvent, 2009 in Usapein + Tongcumpou 2016
2	Ag	15700		Nuss + Eckelman 2014	https://journals.plos.org/plosone/article?id=10.1371/journal.pone.0101298
Regional averages
	ASIA	246000
	LAM	110570
	MAF	246000
	OECD	190535
	REF	246000
	Other	246000
	Recycled	15100

## Sheet: Al
Using a regional approach, assuming that Al production in the REF region has the global average CO2 intensity
Primary:
	Material	kg CO2/ton	Region	Source	Link	Notes
1	Al	20000	ASIA	Int'l Aluminium Inst, 2015	https://www.world-aluminium.org/media/filer_public/2017/06/28/lca_report_2015_final.pdf	cradle-to-gate, all processes in China
2	Al	7000	LAM	Int'l Aluminium Inst, 2015	https://www.world-aluminium.org/media/filer_public/2017/06/28/lca_report_2015_final.pdf	production, electrolysis take place in Europe after bauxite mined
3	Al	15000	MAF	Int'l Aluminium Inst, 2015	https://www.world-aluminium.org/media/filer_public/2017/06/28/lca_report_2015_final.pdf	bauxite from AUS, processed in Middle East
4	Al	5000	OECD	Int'l Aluminium Inst, 2015	https://www.world-aluminium.org/media/filer_public/2017/06/28/lca_report_2015_final.pdf	bauxite from LAM, processed in NA
5	Al	12200	Global average	Nuss + Eckelman 2014	https://journals.plos.org/plosone/article?id=10.1371/journal.pone.0101298
6	Al	11780	China	Dong et al., 2018	https://www.sciencedirect.com/science/article/abs/pii/S0959652618327045
Secondary:
	Material	kg CO2/ton	Region	Source	Link	Notes
1	Al	1400		Nuss + Eckelman 2014	https://journals.plos.org/plosone/article?id=10.1371/journal.pone.0101298
2	Al	940	China	Dong et al., 2018	https://www.sciencedirect.com/science/article/abs/pii/S0959652618327045
Regional averages
	ASIA	15890
	LAM	7000
	MAF	15000
	OECD	5000
	REF	12200
	Other	12200
	Recycled	1170

## Sheet: Cd
Using global average from N+E
Primary:
	Material	kg CO2/ton	Region	Source	Link	Notes
1	Cd	3000	Global average	Nuss + Eckelman 2014	https://journals.plos.org/plosone/article?id=10.1371/journal.pone.0101298
Secondary:
Regional averages
	ASIA	3000
	LAM	3000
	MAF	3000
	OECD	3000
	REF	3000
	Other	3000
	Recycled	0

## Sheet: Cement
Regional approach
No recycling
Primary
	Material	kg CO2/ton	Region	Source	Link	Notes
	Cement	799	ASIA	Li et al., 2014	https://link.springer.com/article/10.1007/s11367-014-0804-4?shared-article-renderer
	Cement	358	MAF	Climate Action Tracker, 2019	https://www.climate-transparency.org/wp-content/uploads/2019/11/B2G_2019_South_Africa.pdf	South Africa
	Cement	899	OECD	Chen et al., 2010	https://www.sciencedirect.com/science/article/abs/pii/S0959652609004089
	Cement	799	OECD	Garcia-Gusano et al., 2014	https://link.springer.com/article/10.1007/s10098-014-0757-0
	Cement	879	ASIA	Worrell et al 2001	https://www.annualreviews.org/doi/abs/10.1146/annurev.energy.26.1.303	Calculated from China, Table 4 (Mt carbon / Mt cement production, converted to kg CO2 / ton)
	Cement	730	LAM	Worrell et al 2001	https://www.annualreviews.org/doi/abs/10.1146/annurev.energy.26.1.303	Calculated from LAM, Table 4 (Mt carbon / Mt cement production, converted to kg CO2 / ton)
	Cement	851	MAF	Worrell et al 2001	https://www.annualreviews.org/doi/abs/10.1146/annurev.energy.26.1.303	Calculated from Middle East, Table 4 (Mt carbon / Mt cement production, converted to kg CO2 / ton)
	Cement	712	OECD	Worrell et al 2001	https://www.annualreviews.org/doi/abs/10.1146/annurev.energy.26.1.303	Calculated from Europe, Table 4 (Mt carbon / Mt cement production, converted to kg CO2 / ton)
	Cement	693	OECD	Worrell et al 2001	https://www.annualreviews.org/doi/abs/10.1146/annurev.energy.26.1.303	Calculated from OECD Pacific, Table 4 (Mt carbon / Mt cement production, converted to kg CO2 / ton)
	Cement	847	ASIA	Worrell et al 2001	https://www.annualreviews.org/doi/abs/10.1146/annurev.energy.26.1.303	Calculated from Other Asia, Table 4 (Mt carbon / Mt cement production, converted to kg CO2 / ton)
	Cement	888	OECD	Worrell et al 2001	https://www.annualreviews.org/doi/abs/10.1146/annurev.energy.26.1.303	Calculated from North America, Table 4 (Mt carbon / Mt cement production, converted to kg CO2 / ton)
	Cement	790	REF	Worrell et al 2001	https://www.annualreviews.org/doi/abs/10.1146/annurev.energy.26.1.303	Calculated from Former USSR, Table 4 (Mt carbon / Mt cement production, converted to kg CO2 / ton)
	Cement	928	ASIA	Worrell et al 2001	https://www.annualreviews.org/doi/abs/10.1146/annurev.energy.26.1.303	Calculated from India, Table 4 (Mt carbon / Mt cement production, converted to kg CO2 / ton)
	Cement	805	MAF	Worrell et al 2001	https://www.annualreviews.org/doi/abs/10.1146/annurev.energy.26.1.303	Calculated from Africa, Table 4 (Mt carbon / Mt cement production, converted to kg CO2 / ton)
	Cement	601	LAM	FICEM Statistical Report 2013	https://www.ficem.org/estadisticas/statiscal_report_2013.pdf
Regional averages
	ASIA	863.25
	LAM	665.5
	MAF	671.333
	OECD	798.2
	REF	790
	Other	771.933
	Recycled	0

## Sheet: Cu
Regional approach
Primary
	Material	kg CO2/ton	Region	Source	Link	Notes
1	Cu	4000	ASIA	Beylot et al., 2018	https://www.sciencedirect.com/science/article/abs/pii/S0959652618331718
2	Cu	8500	MAF	Dong et al., 2020	https://www.sciencedirect.com/science/article/pii/S0959652620328705
3	Cu	3200	Global average	Nuss + Eckelman 2014	https://journals.plos.org/plosone/article?id=10.1371/journal.pone.0101298	Weighted average of below processes, as calculated from Table S38 of Nuss + Eckelman 2014
4	Cu	2300	MAF	Nuss + Eckelman 2014	https://journals.plos.org/plosone/article?id=10.1371/journal.pone.0101298
5	Cu	2300	OECD	Nuss + Eckelman 2014	https://journals.plos.org/plosone/article?id=10.1371/journal.pone.0101298
6	Cu	2500	REF	Nuss + Eckelman 2014	https://journals.plos.org/plosone/article?id=10.1371/journal.pone.0101298
7	Cu	3100	Other/World	Nuss + Eckelman 2014	https://journals.plos.org/plosone/article?id=10.1371/journal.pone.0101298
8	Cu	5000	Other/World	Nuss + Eckelman 2014	https://journals.plos.org/plosone/article?id=10.1371/journal.pone.0101298
9	Cu	3418	China	Jingjing et al., 2019	https://www.sciencedirect.com/science/article/abs/pii/S0921344919301260
10	Cu	5900	Asia Pacific	Nilsson et al 2017 (Ecoinvent 3.3)	https://www.mdpi.com/2075-163X/7/9/168#supplementary	Calculated using PlotDigitizer on Figure 2
11	Cu	3600	LAM	Nilsson et al 2017 (Ecoinvent 3.3)	https://www.mdpi.com/2075-163X/7/9/168#supplementary	Calculated using PlotDigitizer on Figure 2
12	Cu	5600	OECD (N. America)	Nilsson et al 2017 (Ecoinvent 3.3)	https://www.mdpi.com/2075-163X/7/9/168#supplementary	Calculated using PlotDigitizer on Figure 2
13	Cu	3600	OECD (AUS)	Nilsson et al 2017 (Ecoinvent 3.3)	https://www.mdpi.com/2075-163X/7/9/168#supplementary	Calculated using PlotDigitizer on Figure 2
14	Cu	6200	OECD (AUS)	Nilsson et al 2017 (Norgate et al 2007)	https://www.mdpi.com/2075-163X/7/9/168#supplementary	Calculated using PlotDigitizer on Figure 2
15	Cu	3300	OECD (AUS)	Nilsson et al 2017 (Norgate et al 2007)	https://www.mdpi.com/2075-163X/7/9/168#supplementary	Calculated using PlotDigitizer on Figure 2
16	Cu	5000	OECD (AUS)	Nilsson et al 2017 (Northey et al 2013)	https://www.mdpi.com/2075-163X/7/9/168#supplementary	Calculated using PlotDigitizer on Figure 2
17	Cu	2100	OECD (AUS)	Nilsson et al 2017 (Northey et al 2013)	https://www.mdpi.com/2075-163X/7/9/168#supplementary	Calculated using PlotDigitizer on Figure 2
18	Cu	2300	OECD (CAN)	Nilsson et al 2017 (Northey et al 2013)	https://www.mdpi.com/2075-163X/7/9/168#supplementary	Calculated using PlotDigitizer on Figure 2
19	Cu	1400	LAM (CHL)	Nilsson et al 2017 (Northey et al 2013)	https://www.mdpi.com/2075-163X/7/9/168#supplementary	Calculated using PlotDigitizer on Figure 2
20	Cu	2000	LAM (CHL)	Nilsson et al 2017 (Northey et al 2013)	https://www.mdpi.com/2075-163X/7/9/168#supplementary	Calculated using PlotDigitizer on Figure 2
21	Cu	1700	LAM (CHL)	Nilsson et al 2017 (Northey et al 2013)	https://www.mdpi.com/2075-163X/7/9/168#supplementary	Calculated using PlotDigitizer on Figure 2
22	Cu	1100	LAM (CHL)	Nilsson et al 2017 (Northey et al 2013)	https://www.mdpi.com/2075-163X/7/9/168#supplementary	Calculated using PlotDigitizer on Figure 2
23	Cu	3100	LAM (CHL)	Nilsson et al 2017 (Northey et al 2013)	https://www.mdpi.com/2075-163X/7/9/168#supplementary	Calculated using PlotDigitizer on Figure 2
24	Cu	2300	LAM (CHL)	Nilsson et al 2017 (Northey et al 2013)	https://www.mdpi.com/2075-163X/7/9/168#supplementary	Calculated using PlotDigitizer on Figure 2
25	Cu	3900	LAM (CHL)	Nilsson et al 2017 (Northey et al 2013)	https://www.mdpi.com/2075-163X/7/9/168#supplementary	Calculated using PlotDigitizer on Figure 2
26	Cu	3100	LAM (CHL)	Nilsson et al 2017 (Northey et al 2013)	https://www.mdpi.com/2075-163X/7/9/168#supplementary	Calculated using PlotDigitizer on Figure 2
27	Cu	3500	LAM (CHL)	Nilsson et al 2017 (Northey et al 2013)	https://www.mdpi.com/2075-163X/7/9/168#supplementary	Calculated using PlotDigitizer on Figure 2
28	Cu	2500	LAM (CHL)	Nilsson et al 2017 (Northey et al 2013)	https://www.mdpi.com/2075-163X/7/9/168#supplementary	Calculated using PlotDigitizer on Figure 2
29	Cu	2400	OECD (JPN)	Nilsson et al 2017 (Adachi + Mogi 2007)	https://www.mdpi.com/2075-163X/7/9/168#supplementary	Calculated using PlotDigitizer on Figure 2
30	Cu	2800	ASIA (Laos)	Nilsson et al 2017 (Northey et al 2013)	https://www.mdpi.com/2075-163X/7/9/168#supplementary	Calculated using PlotDigitizer on Figure 2
31	Cu	1200	ASIA (Papua New Guinea)	Nilsson et al 2017 (Northey et al 2013)	https://www.mdpi.com/2075-163X/7/9/168#supplementary	Calculated using PlotDigitizer on Figure 2
32	Cu	8500	MAF (S. Africa)	Nilsson et al 2017 (Northey et al 2013)	https://www.mdpi.com/2075-163X/7/9/168#supplementary	Calculated using PlotDigitizer on Figure 2
33	Cu	2100	OECD (SWE)	Nilsson et al 2017 (Ecoinvent 3.3)	https://www.mdpi.com/2075-163X/7/9/168#supplementary	Calculated using PlotDigitizer on Figure 2
34	Cu	4300	OECD (USA)	Nilsson et al 2017 (Northey et al 2013)	https://www.mdpi.com/2075-163X/7/9/168#supplementary	Calculated using PlotDigitizer on Figure 2
Secondary
	Material	kg CO2/ton	Region	Source	Link	Notes
1	Cu	1000		Nuss + Eckelman 2014	https://journals.plos.org/plosone/article?id=10.1371/journal.pone.0101298	Using this figure, which is the weighted average from two processes in Nuss + Eckelman 2014, very consistent with Figure 3 of Nilsson et al 2017
2	Cu	316	China	Jingjing et al., 2019	https://www.sciencedirect.com/science/article/abs/pii/S0921344919301260
Regional averages	kg CO2/ton
ASIA	3463.6
LAM	2563.64
MAF	6433.33
OECD	3563.64
REF	2500
Other	3200
Recycled	1000

## Sheet: Dy
Global average from N+E
No recycling
Primary
	Material	kg CO2/ton	Region	Source	Link	Notes
1	Dy	59600	Global average	Nuss + Eckelman 2014	https://journals.plos.org/plosone/article?id=10.1371/journal.pone.0101298
2	Dy	351000	ASIA	Zapp et al., 2018	https://www.sciencedirect.com/science/article/abs/pii/S0921344917304378?via%3Dihub	Table 7 middle estimate. Could be high? Opting to go with N+E 2014
Regional averages
	ASIA	59600
	LAM	59600
	MAF	59600
	OECD	59600
	REF	59600
	Other	59600
	Recycled	0

[truncated: 11 more sheets: Fiberglass, Ga, Glass, In, Mn, Nd, Ni, Se, Si, Steel, Te]
